# Supplementary material for: Enhanced HOXA10 sumoylation inhibits embryo implantation in women with recurrent implantation failure
Source: PubMed Central journal article supplement (PMC5632741; doi:10.1038/cddiscovery.2017.57), 2017-10-09

**A**

|                 |                                                             |
|-----------------|-------------------------------------------------------------|
| Homo sapiens    | PPPPPQPPQPAPQATSCSFAQN <b>IKEE</b> SSYCLYDSADKCPKVSATAAELAP |
| Pan troglodytes | PPPPPQPPQPAPQATSCSFAQN <b>IKEE</b> SSYCLYDSADKCPKVSATAAELAP |
| Mus musculus    | PPPPPQPPQPQPQATSCSFAQN <b>IKEE</b> SSYCLYDAADKCPKGSAAADLAPF |
| Gallus gallus   | PRSCRMEEPESQQATSCSFAQN <b>IKEE</b> SSYCLYDSEKCPKGSAAADLAPFP |
| Alligator M.    | PRSCRMEEPESQQATSCSFAQN <b>IKEE</b> NSYCLYDSDKCPKGATATDLSTFP |
| Danio rerio     | TSRSCRIEQPNSQITPRSFSP <b>IKEE</b> NSYCLYESEKCPKETITEDISYSR  |

**B**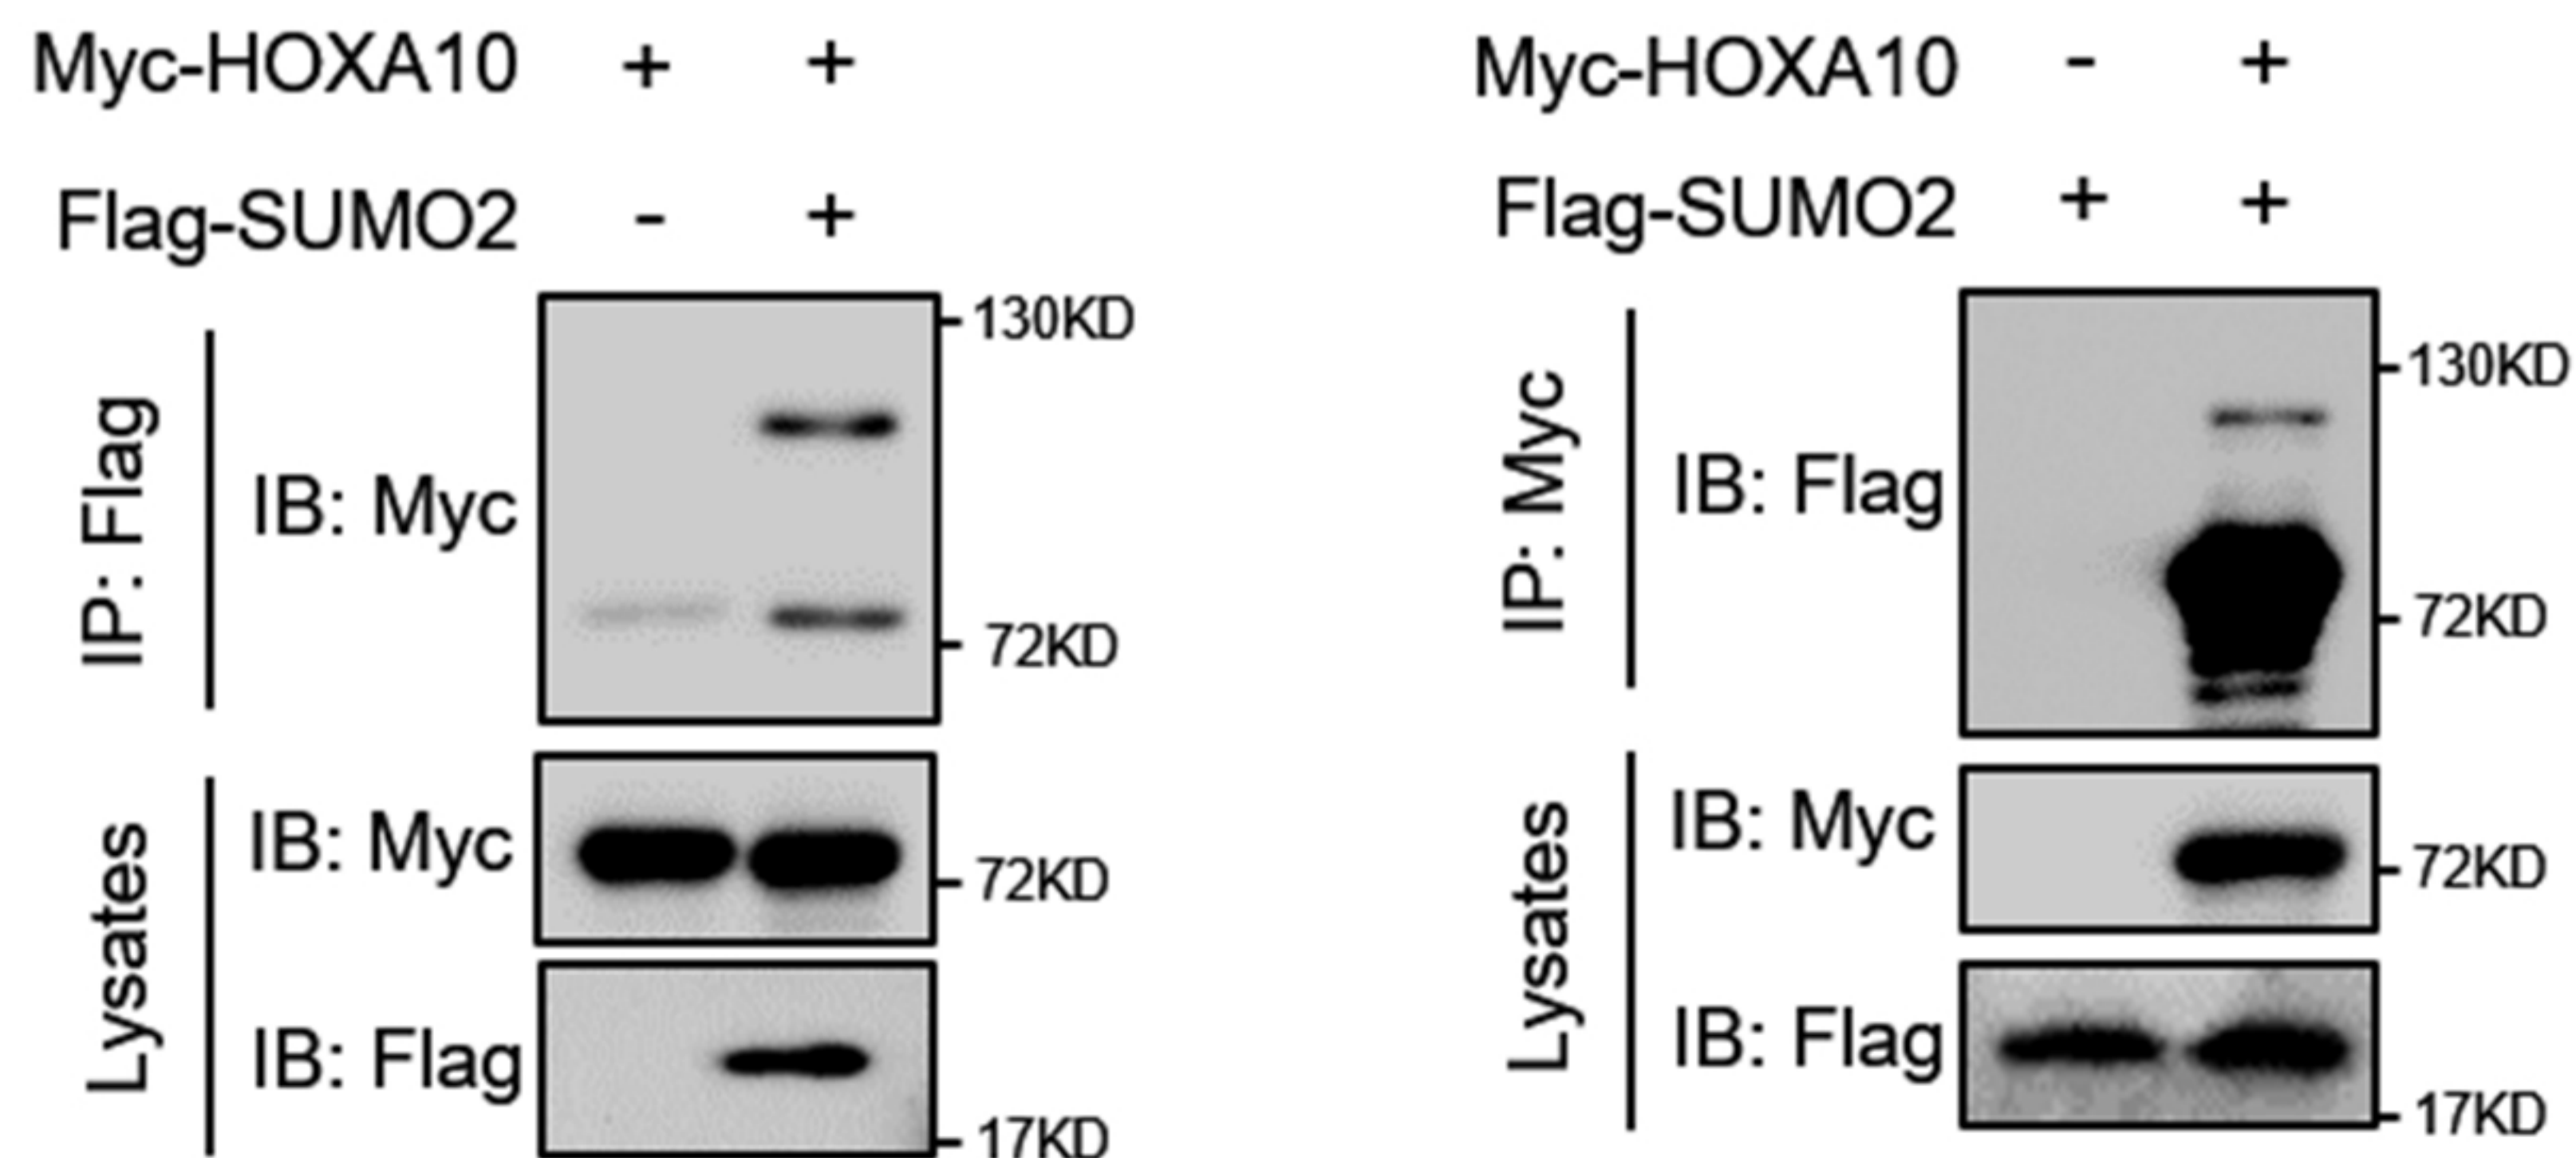

**A**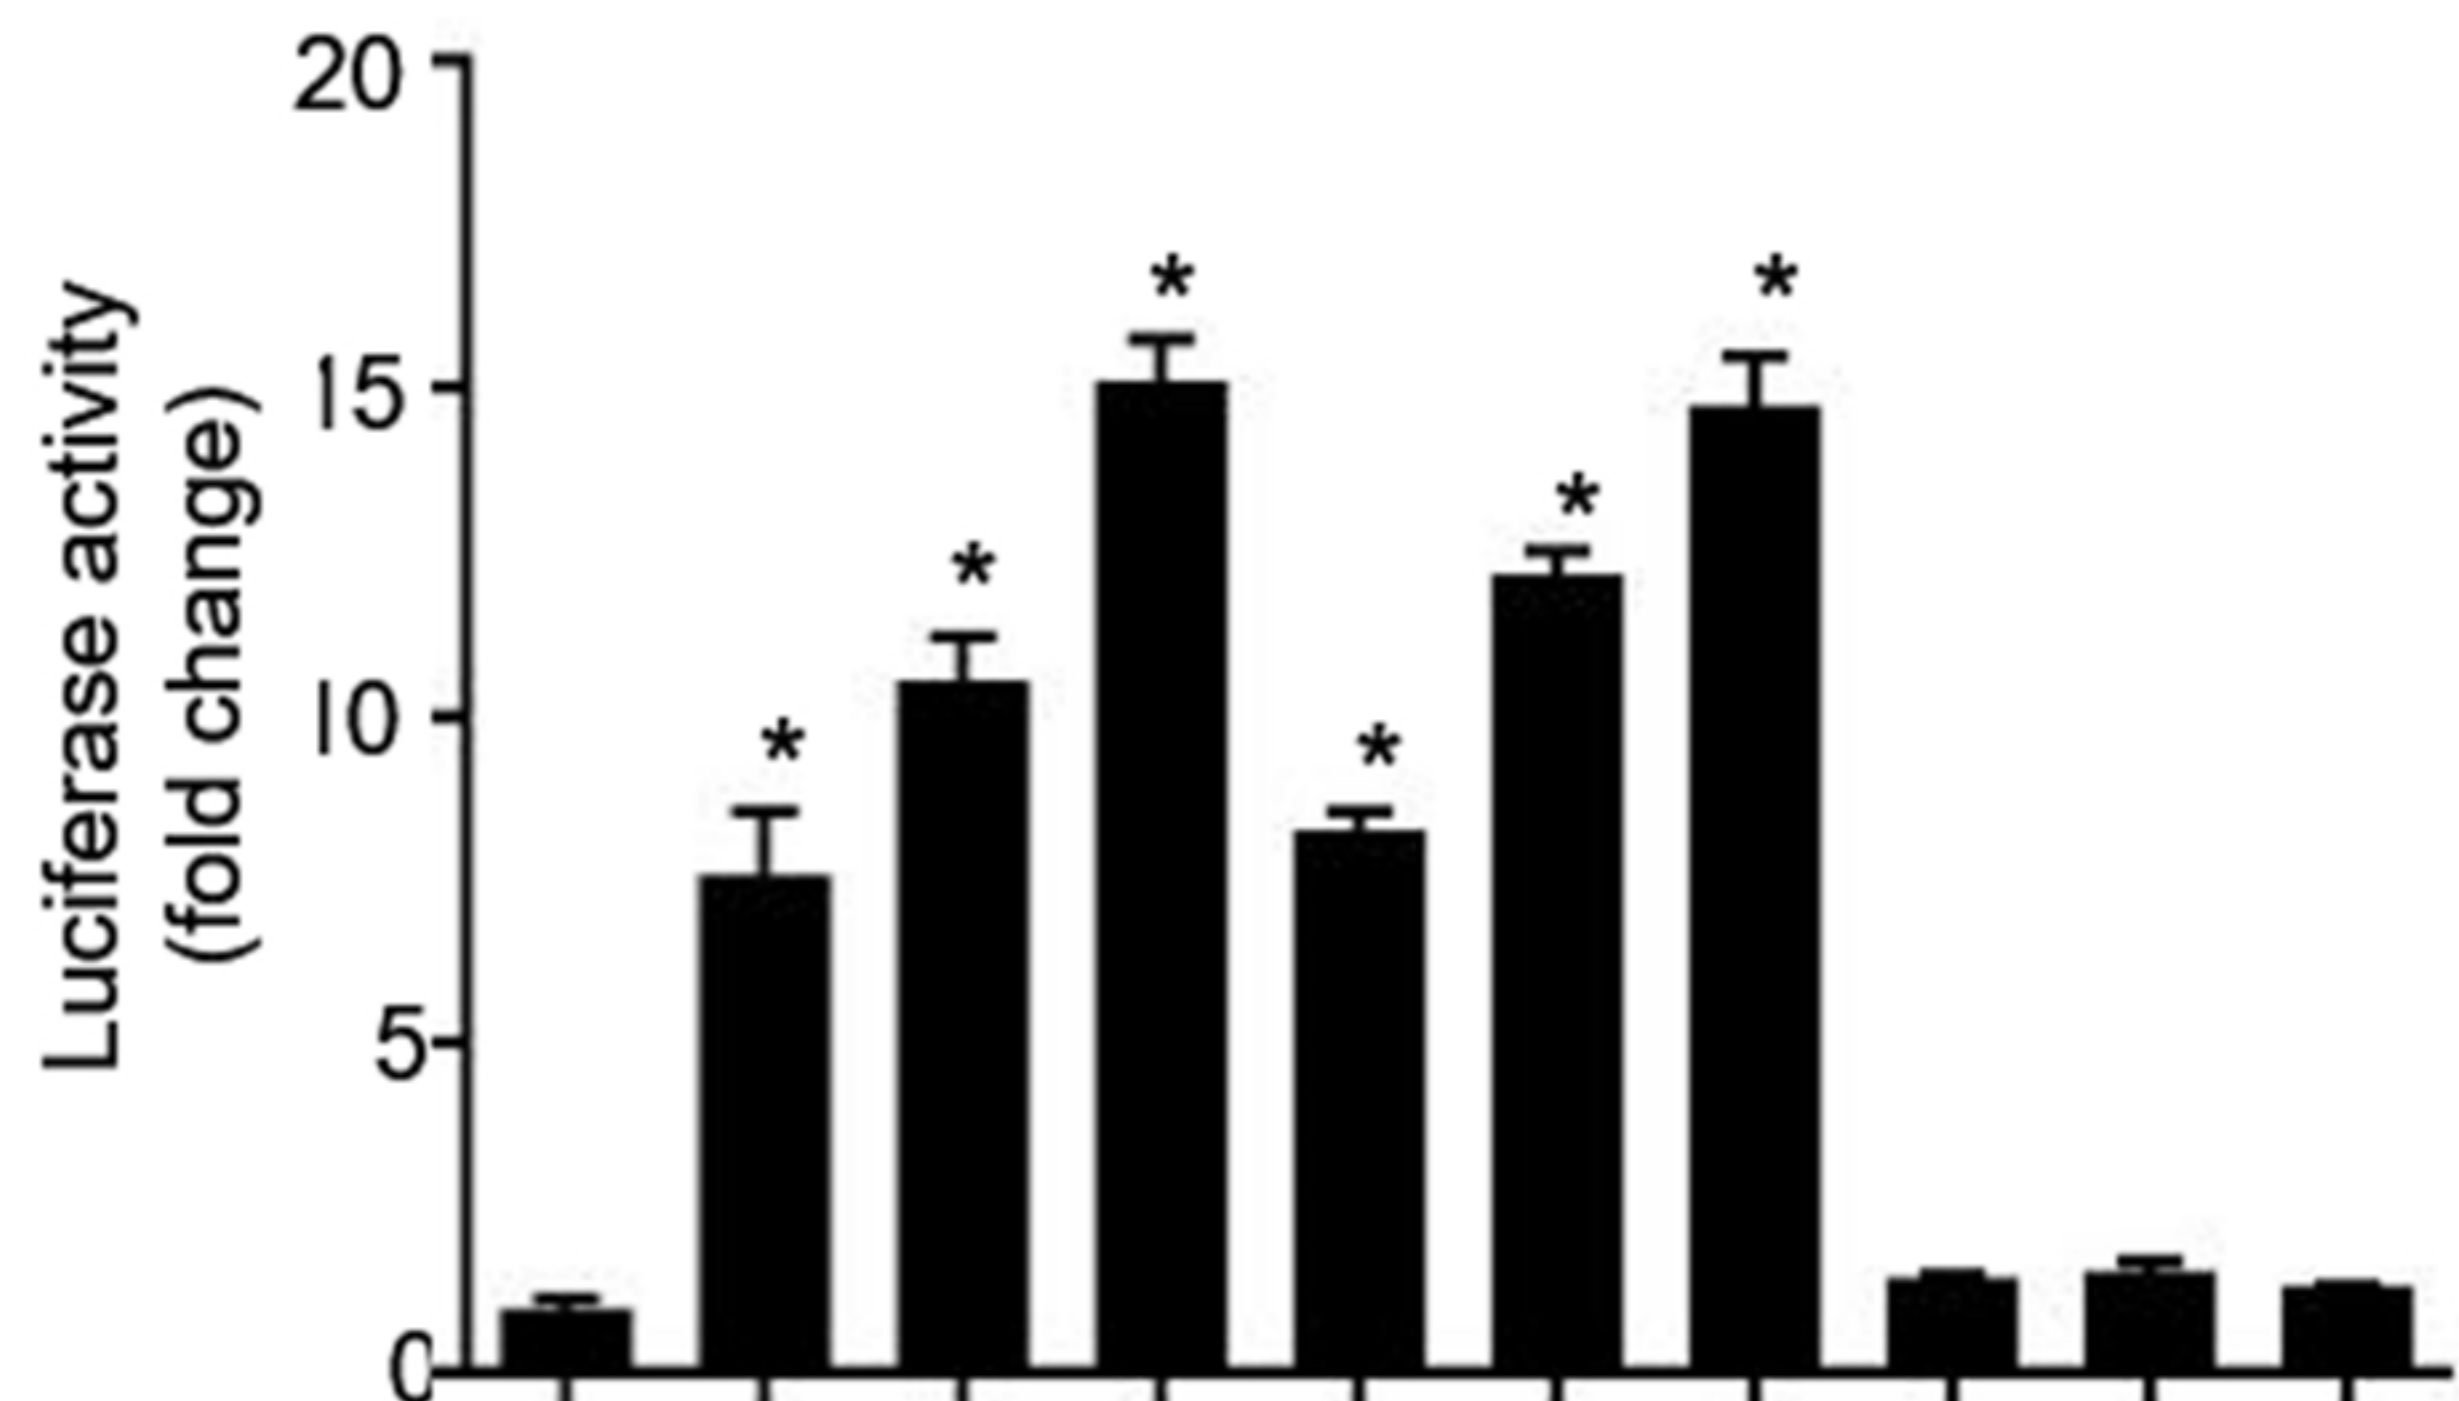

|                       |   |     |     |     |     |     |     |     |     |     |
|-----------------------|---|-----|-----|-----|-----|-----|-----|-----|-----|-----|
| ITGβ 3-Luc (0.3ug)    | + | +   | +   | +   | +   | +   | +   | +   | +   | +   |
| Myc-HOXA10 (ug)       | - | 0.3 | 0.6 | 0.9 | -   | -   | -   | -   | -   | -   |
| Myc-HOXA10 K164R (ug) | - | -   | -   | -   | 0.3 | 0.6 | 0.9 | -   | -   | -   |
| Flag-SUMO1 (ug)       | - | -   | -   | -   | -   | -   | -   | 0.3 | 0.6 | 0.9 |

**B**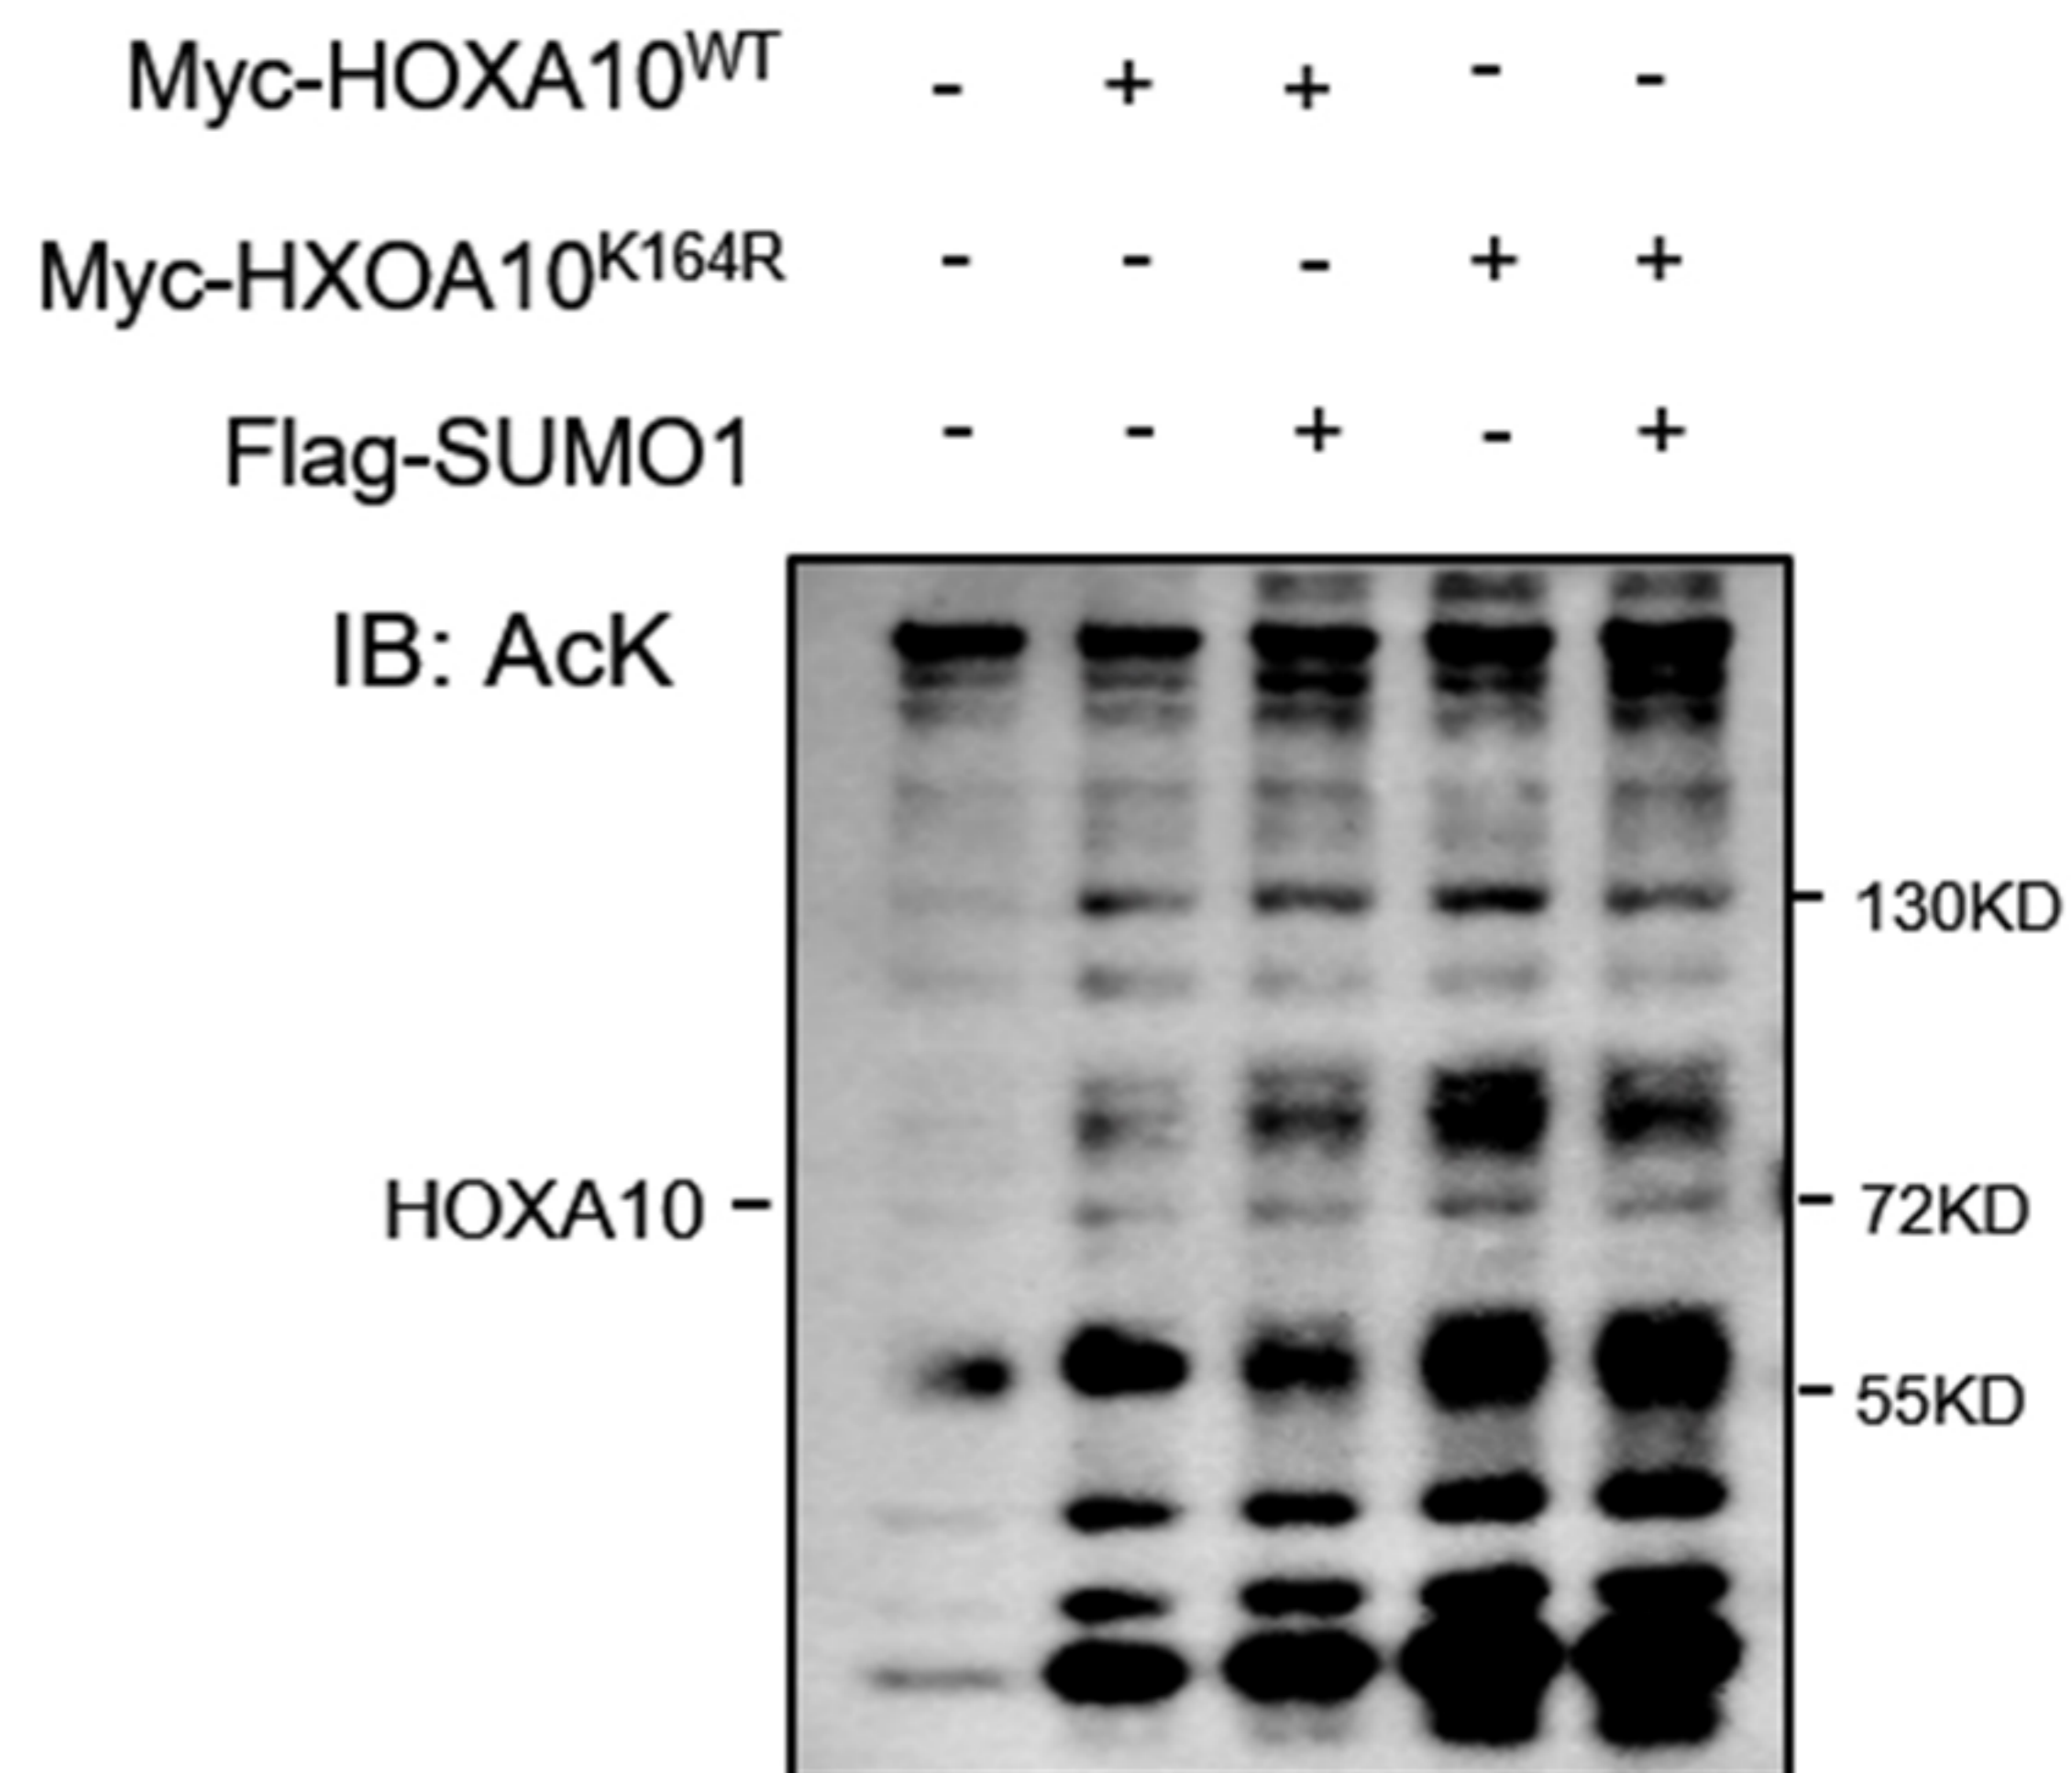**C**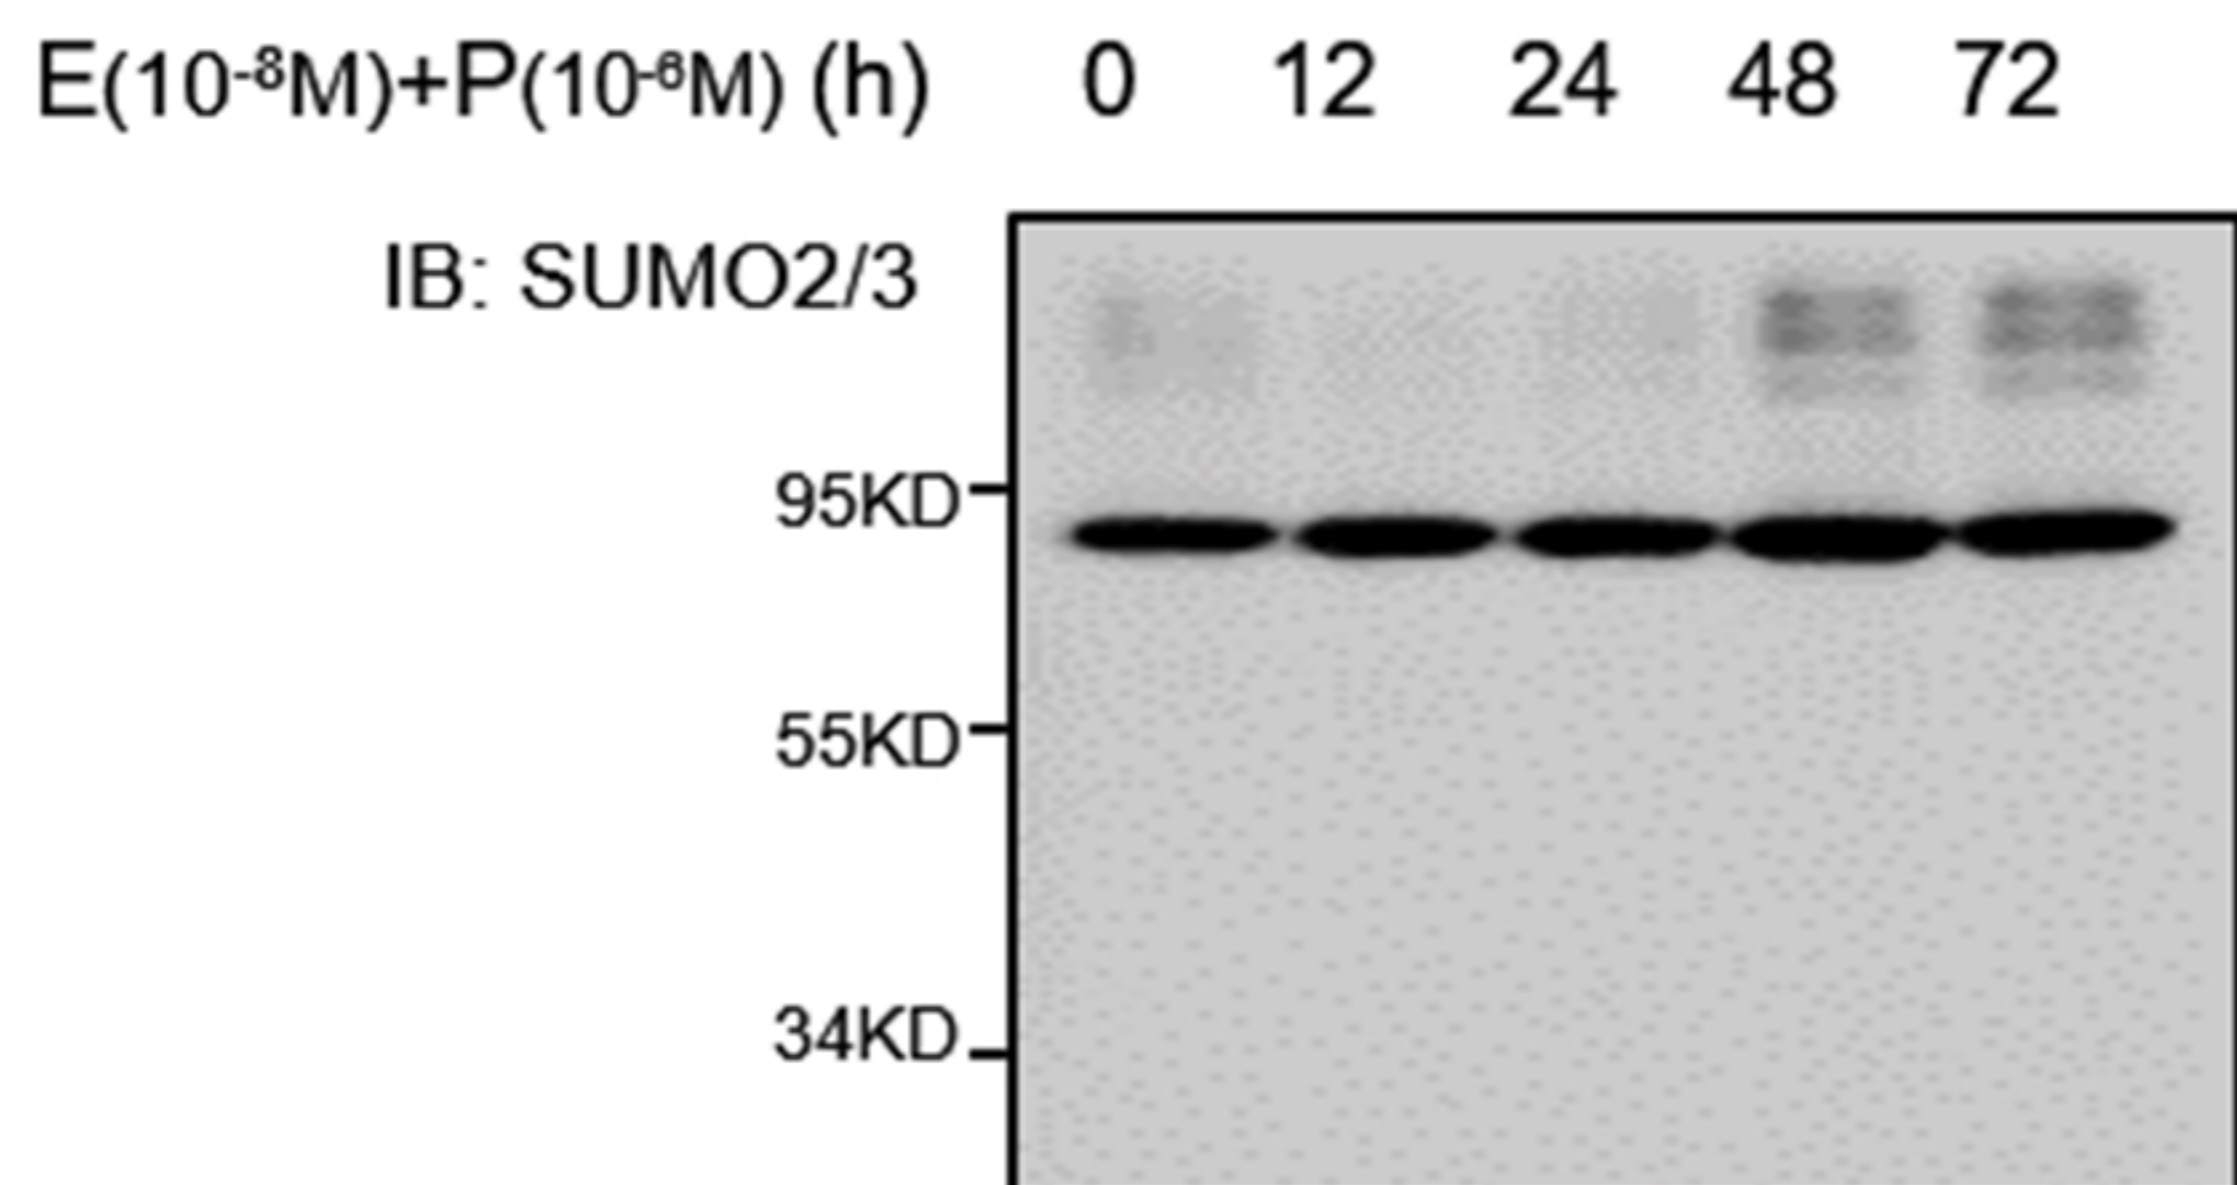**D**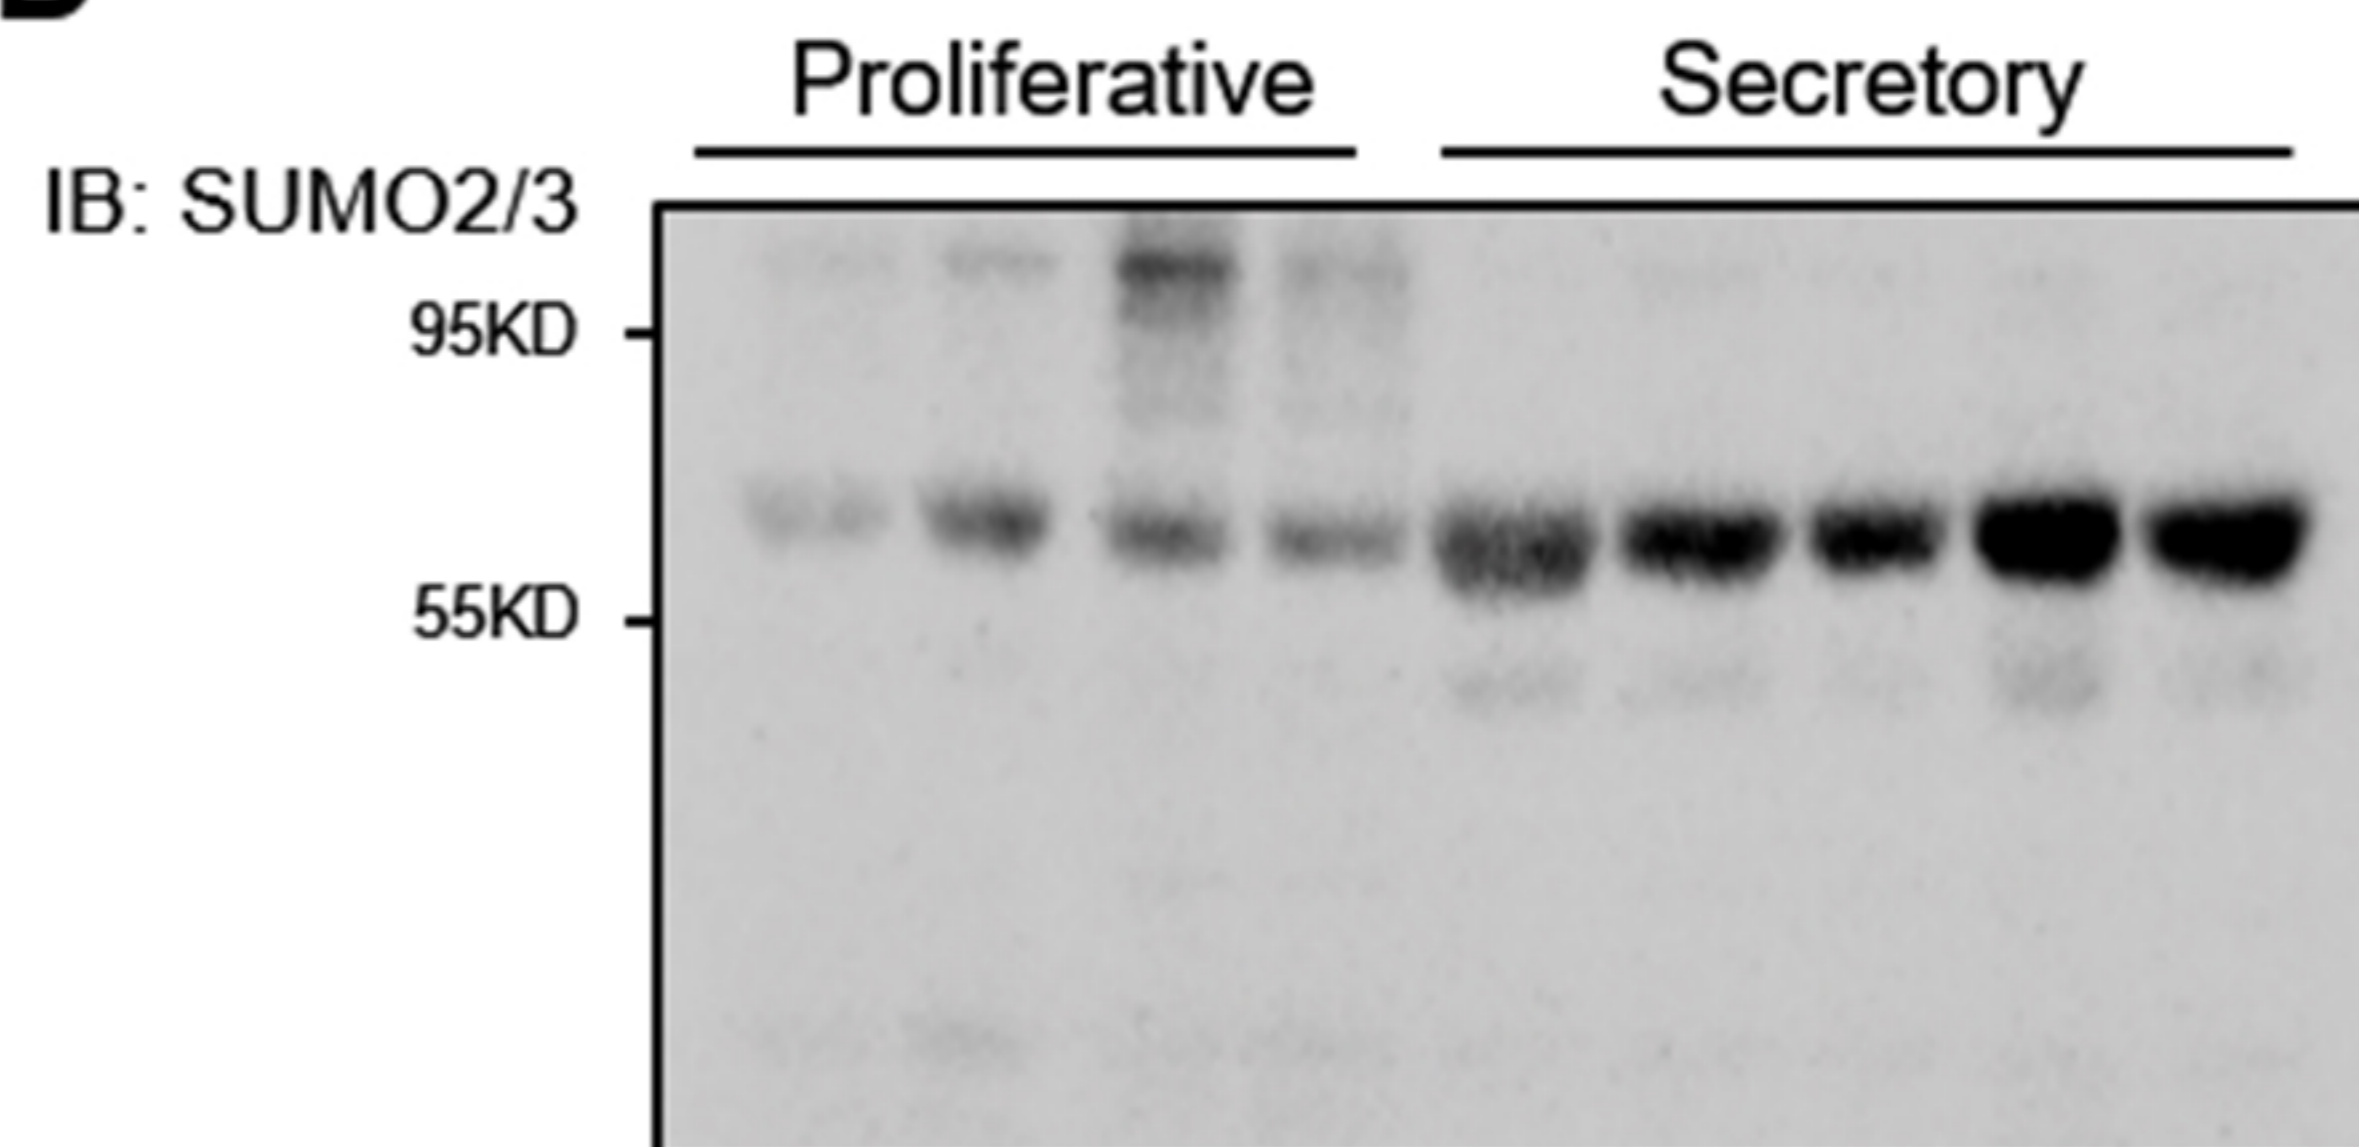

**A**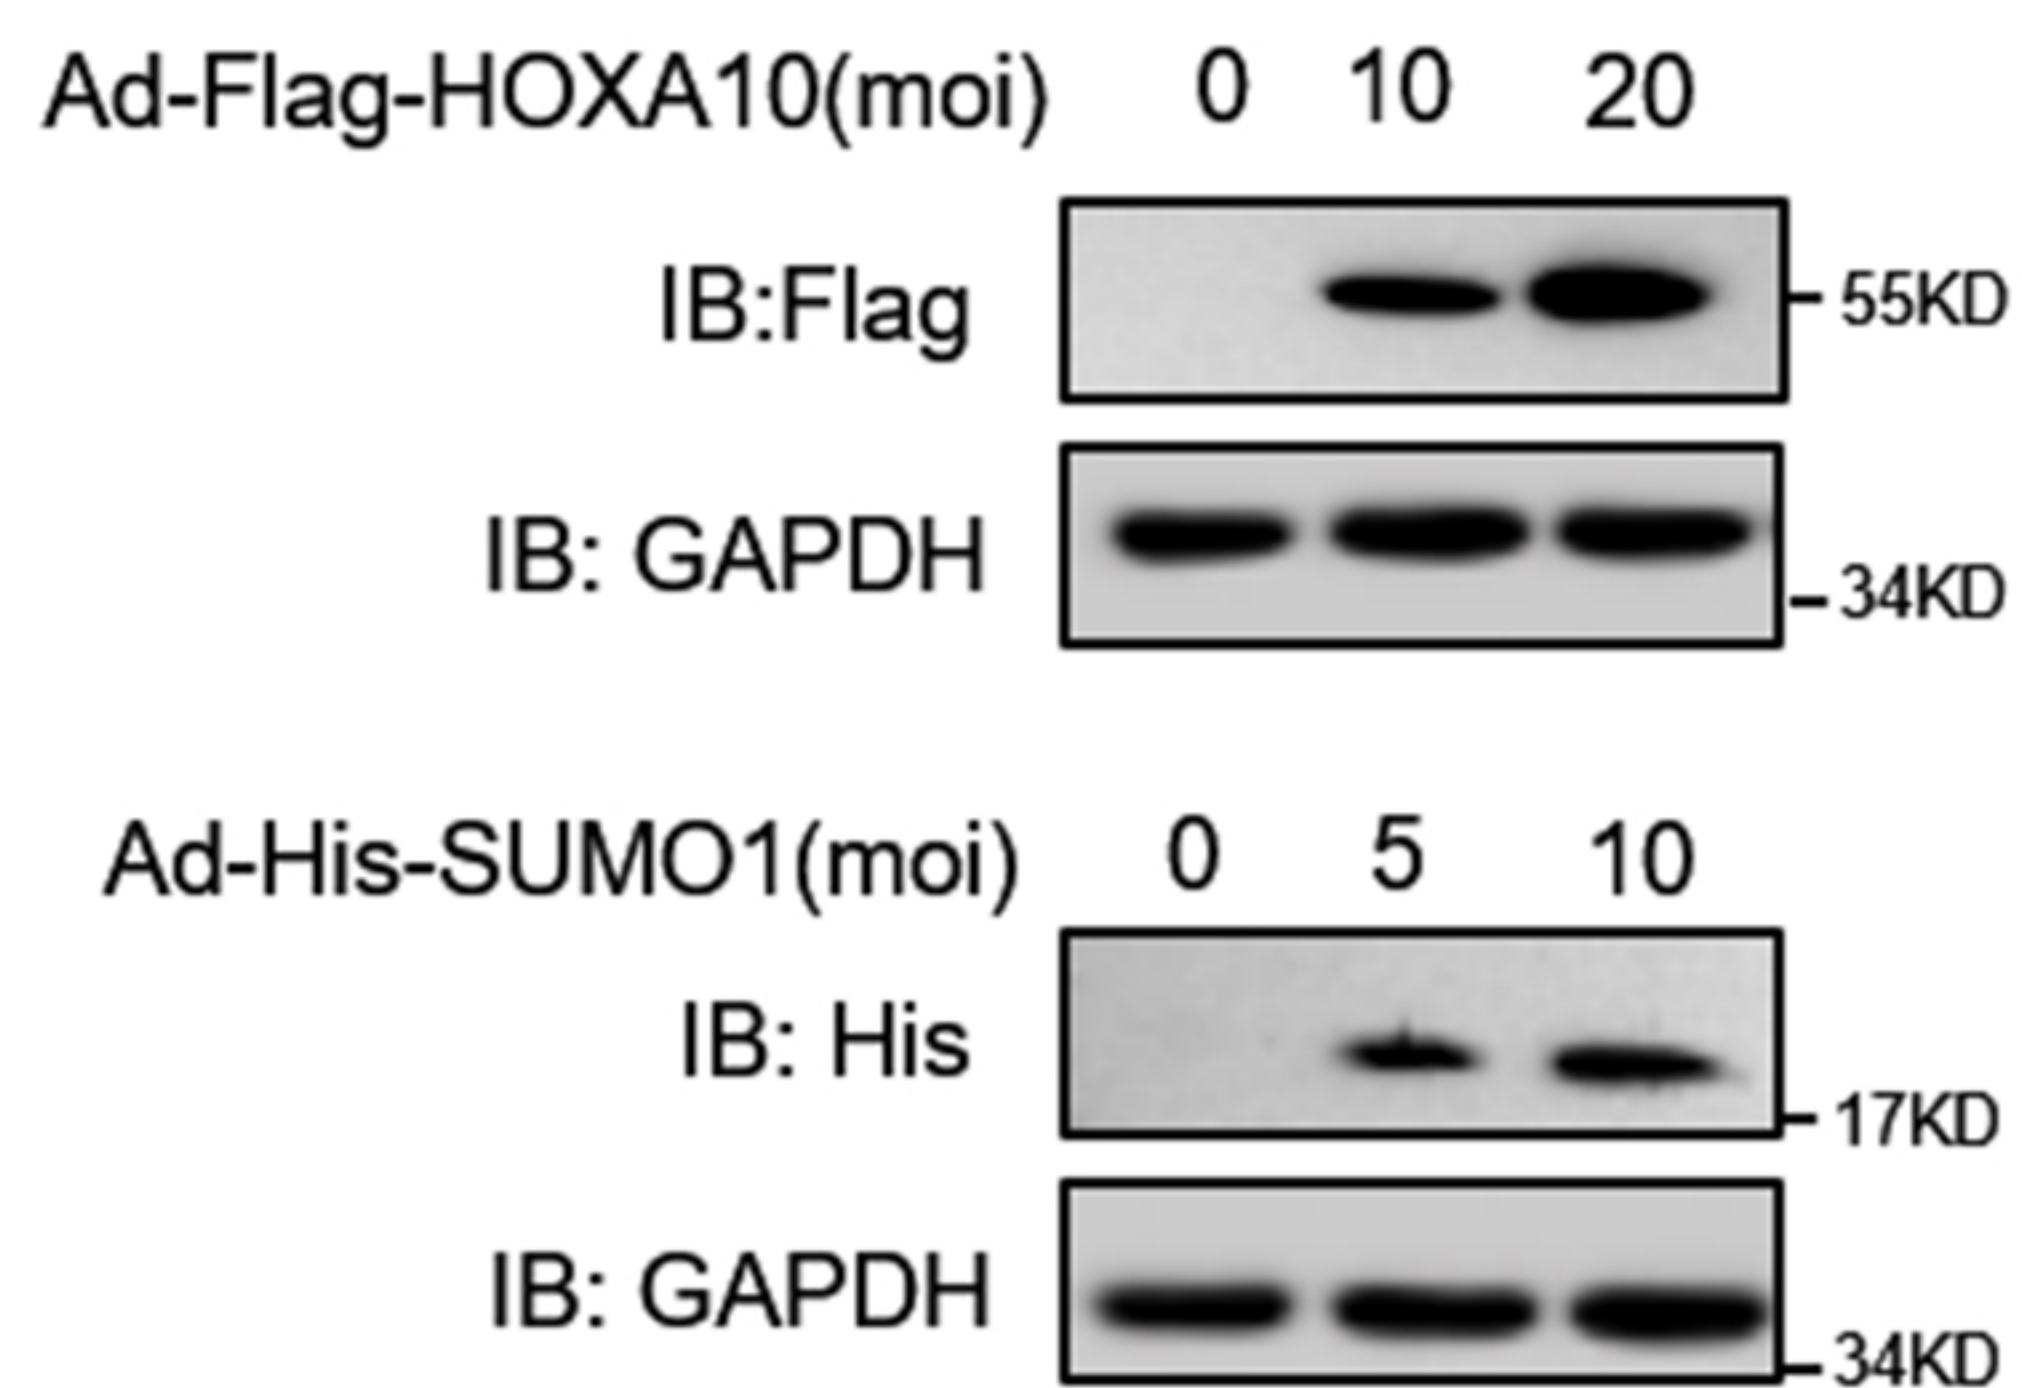**C**

Control

RIF

SUMO2/3

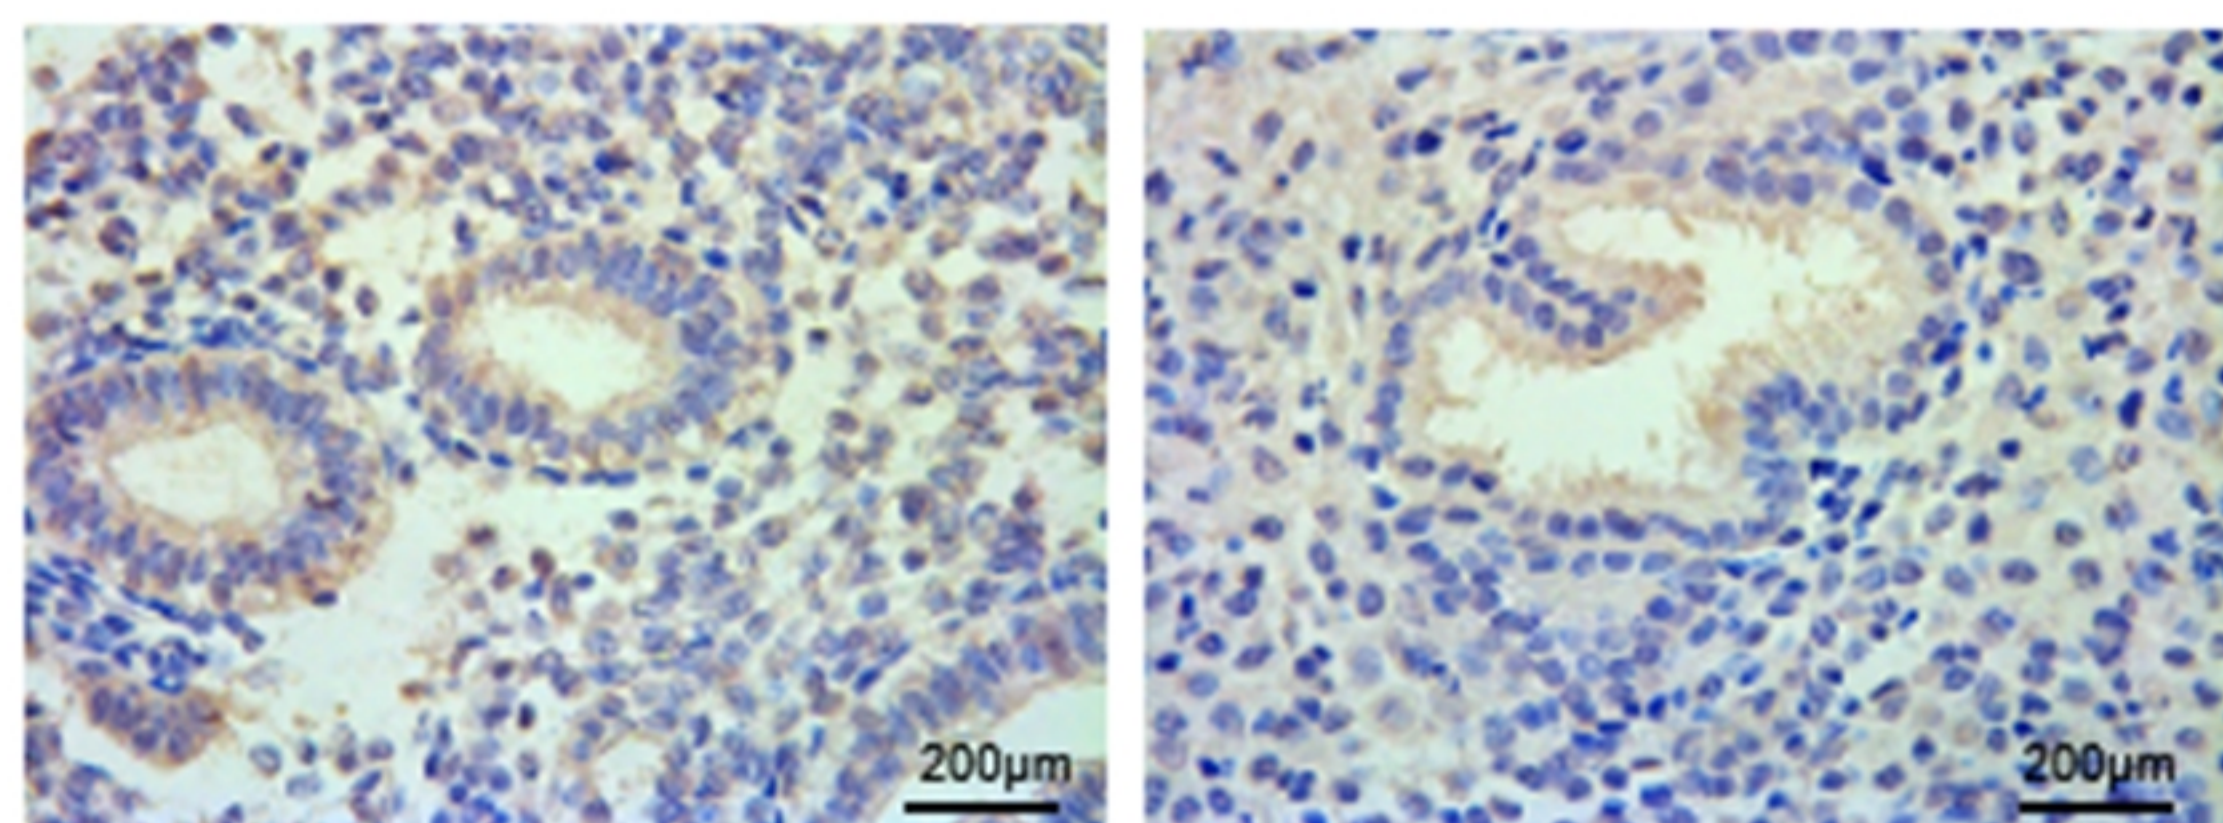

Control

RIF

IB: SUMO2/3

95KD

55KD

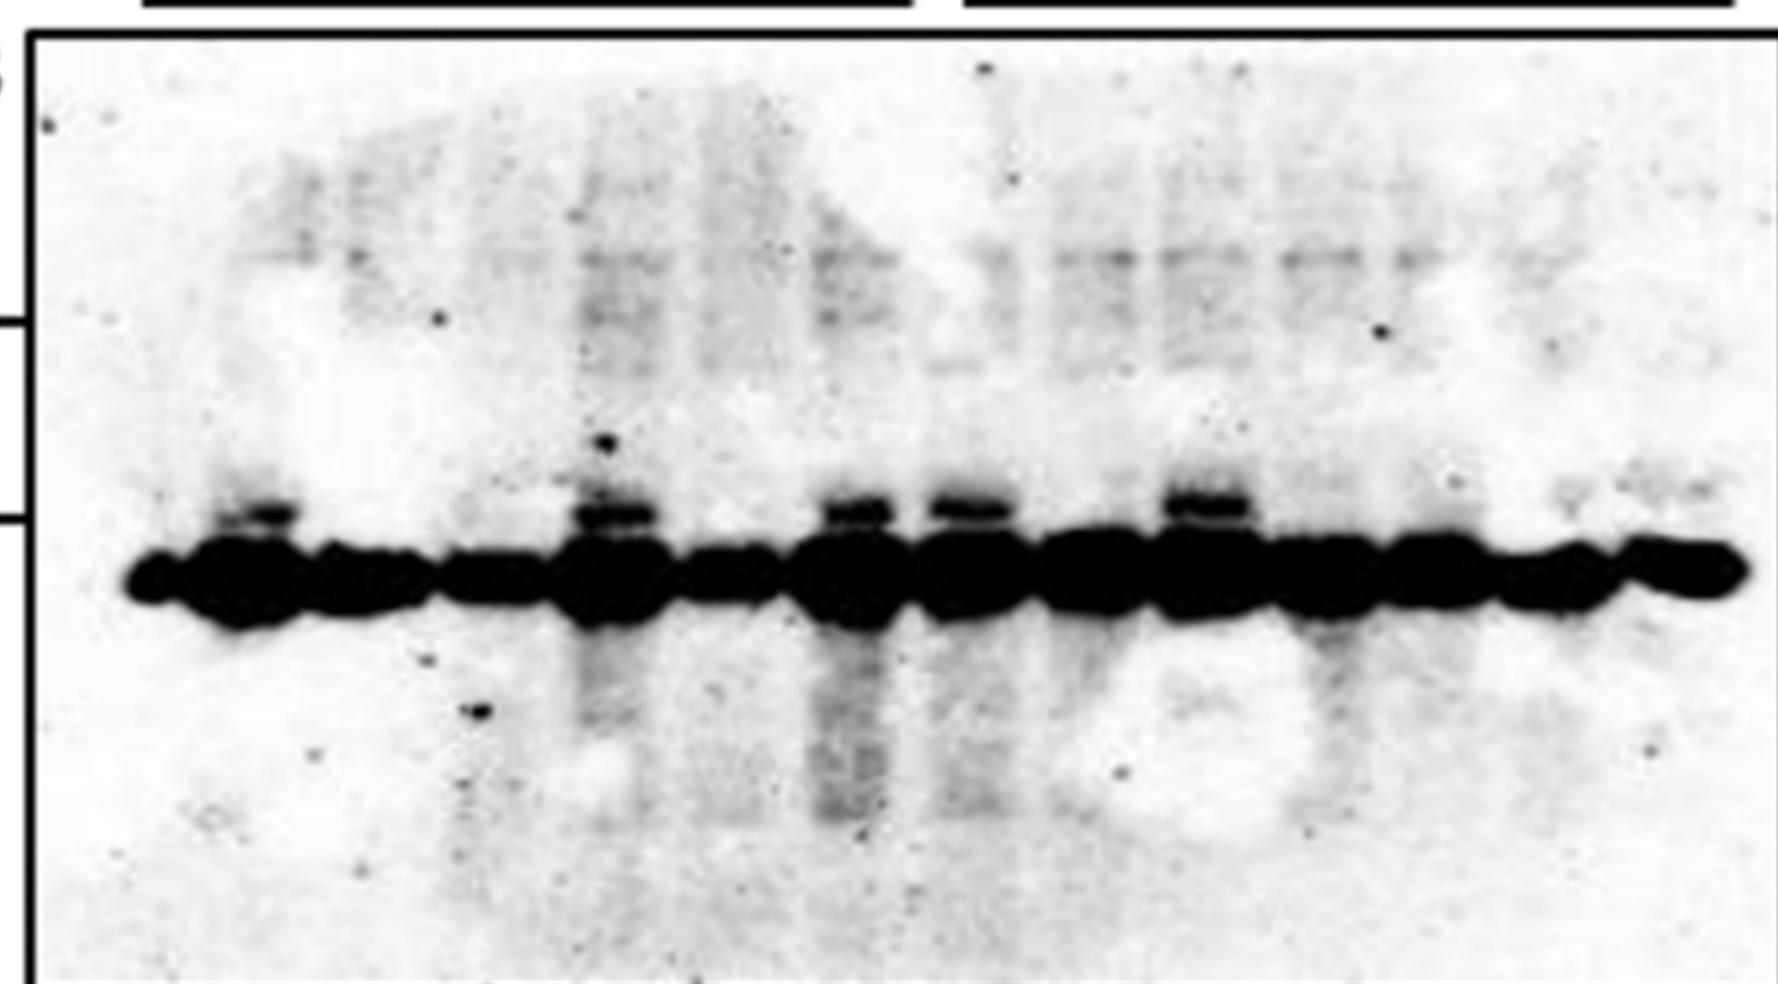**B**

Stage

Bottom

Top

2

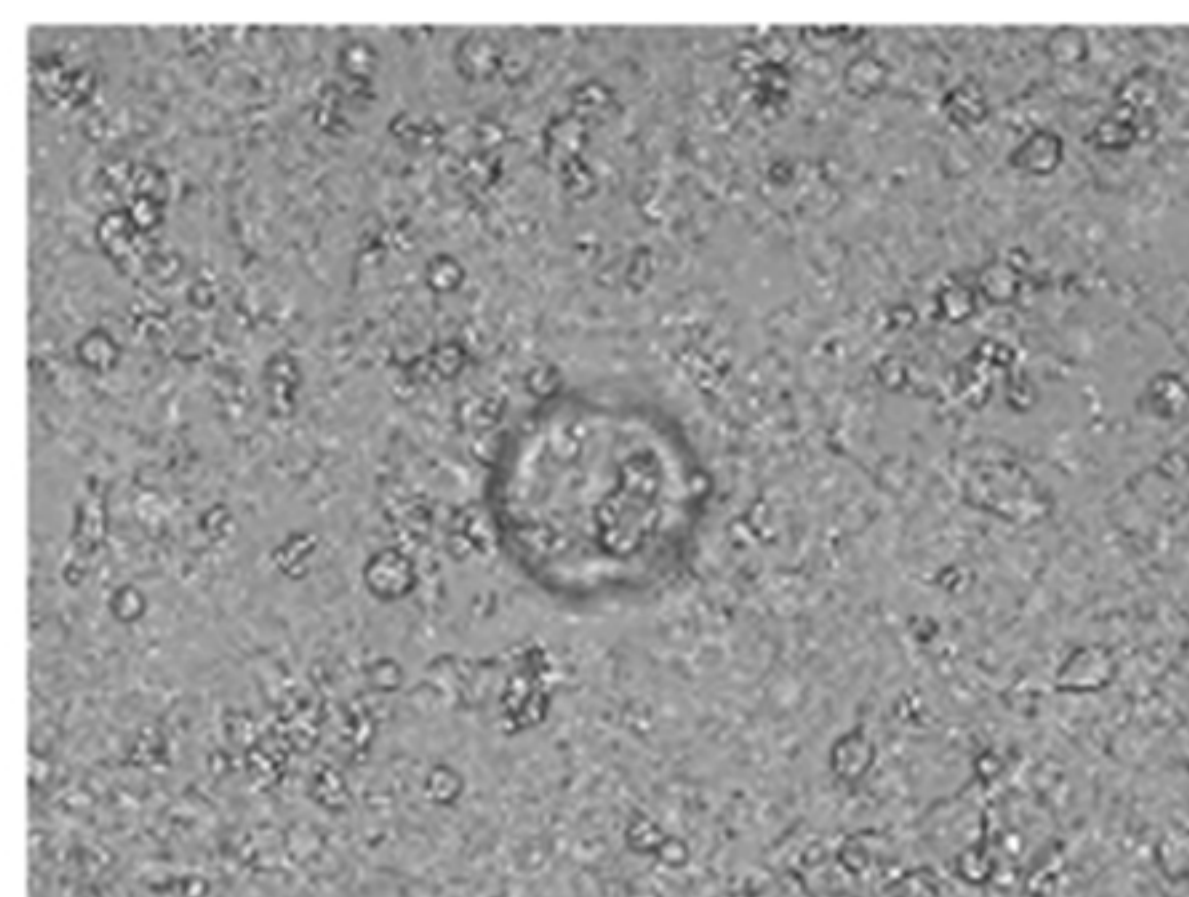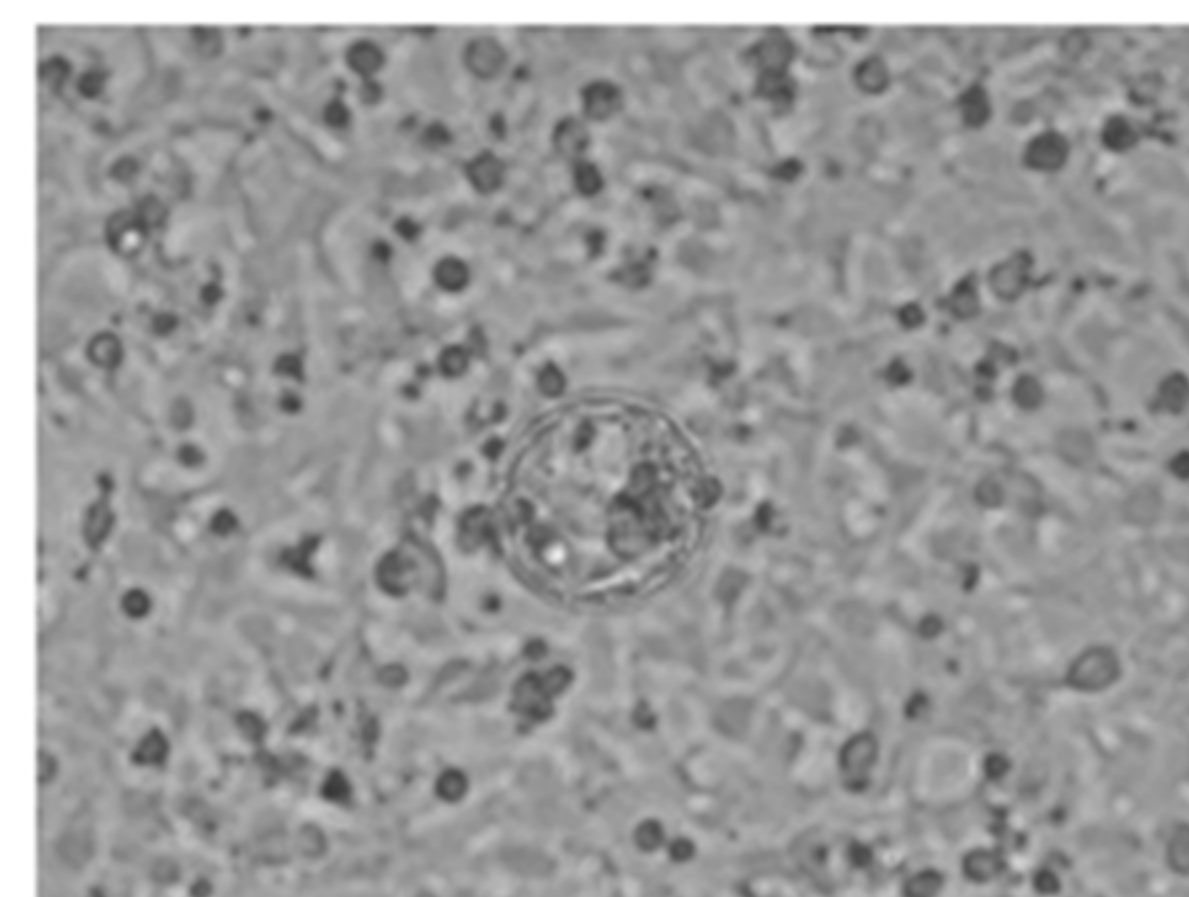

3

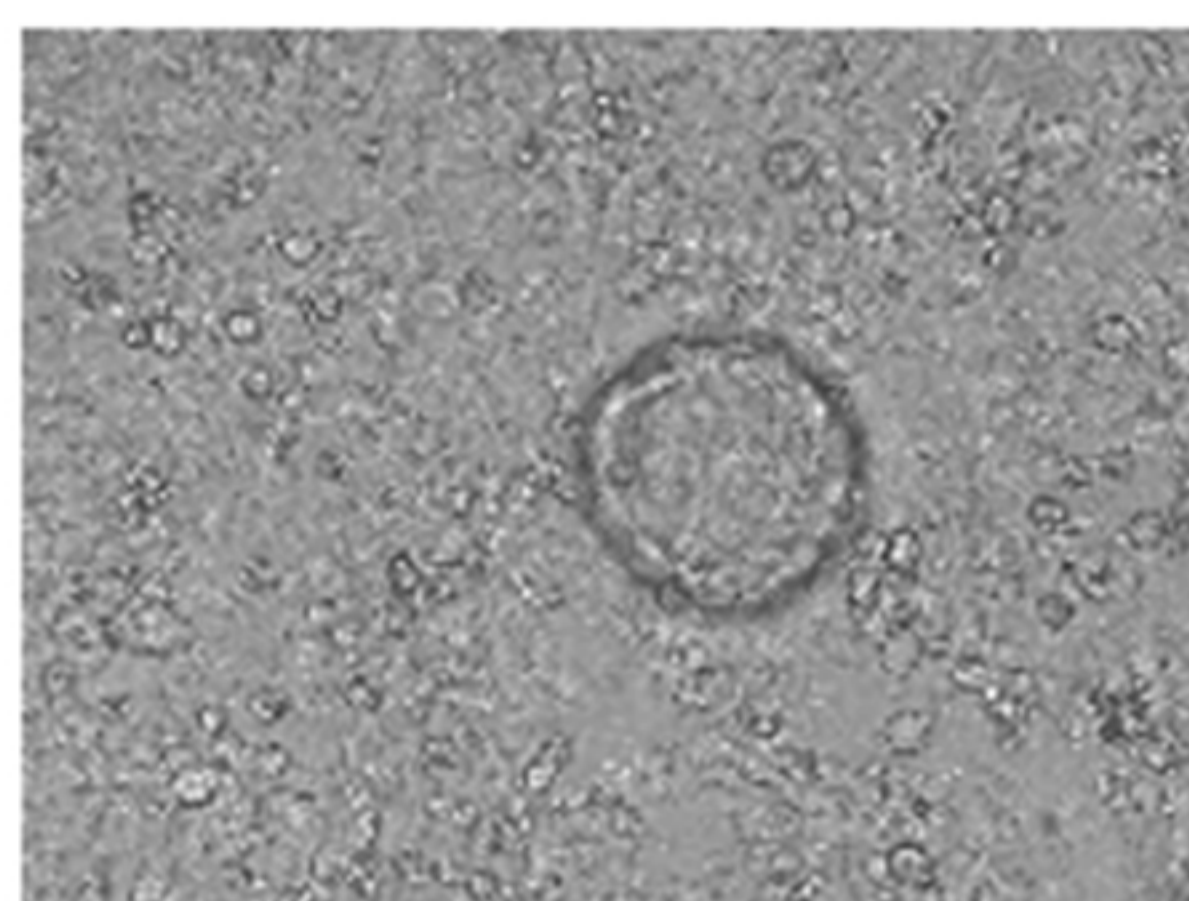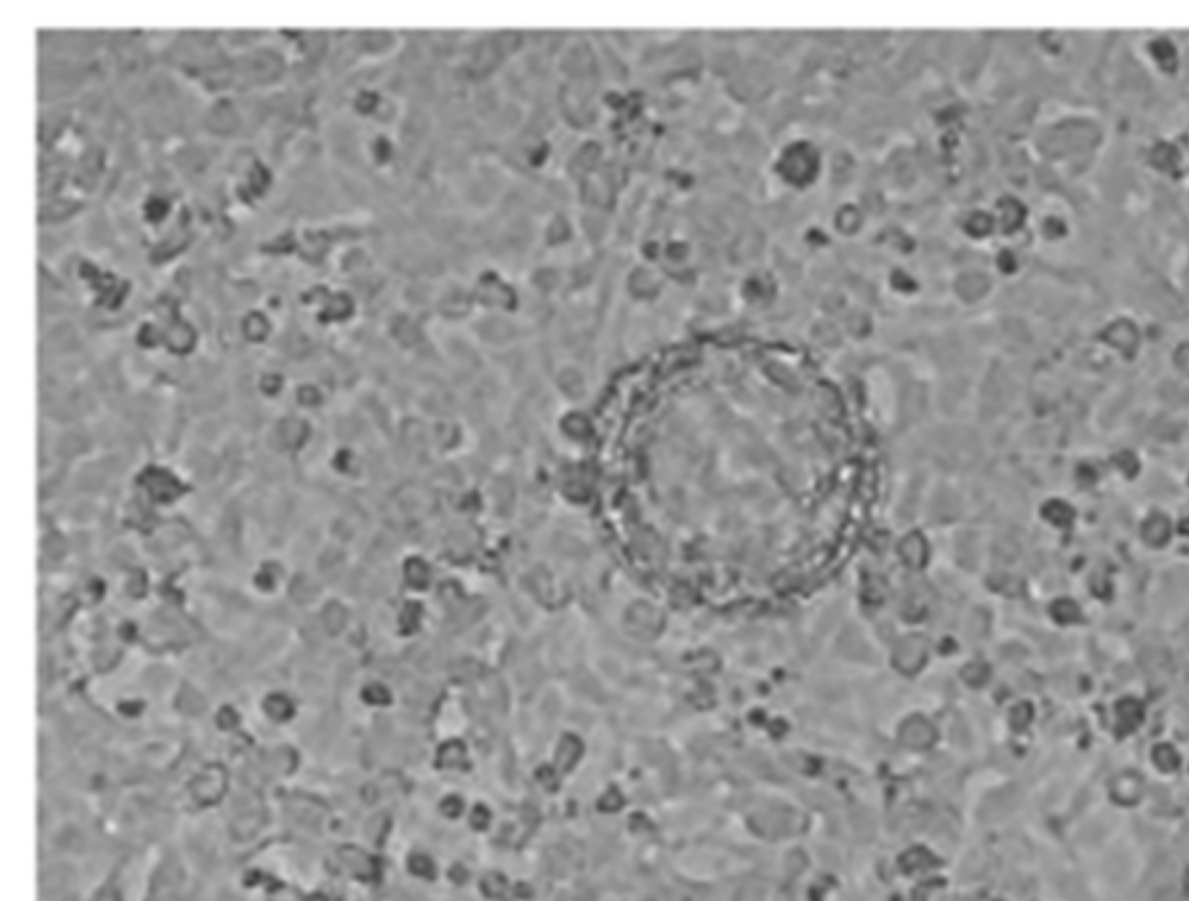

4

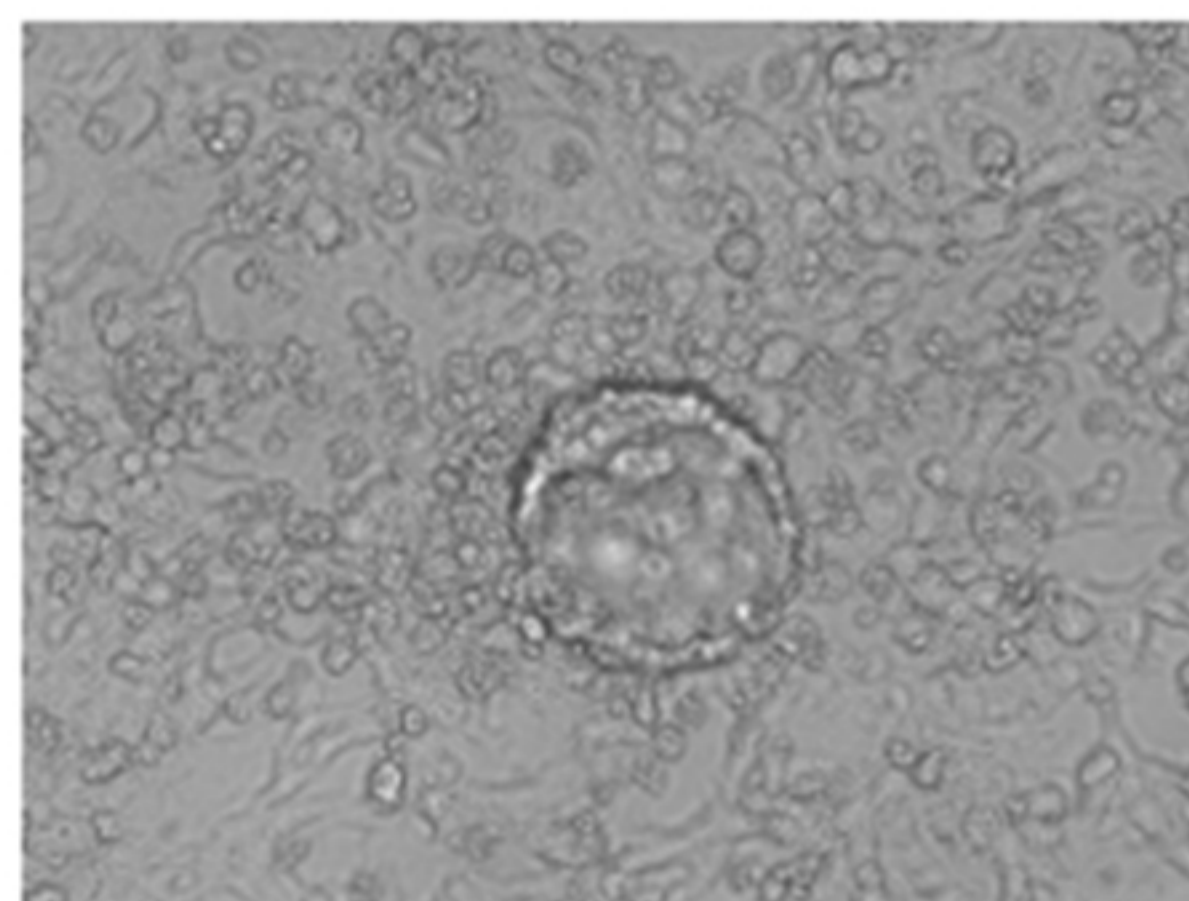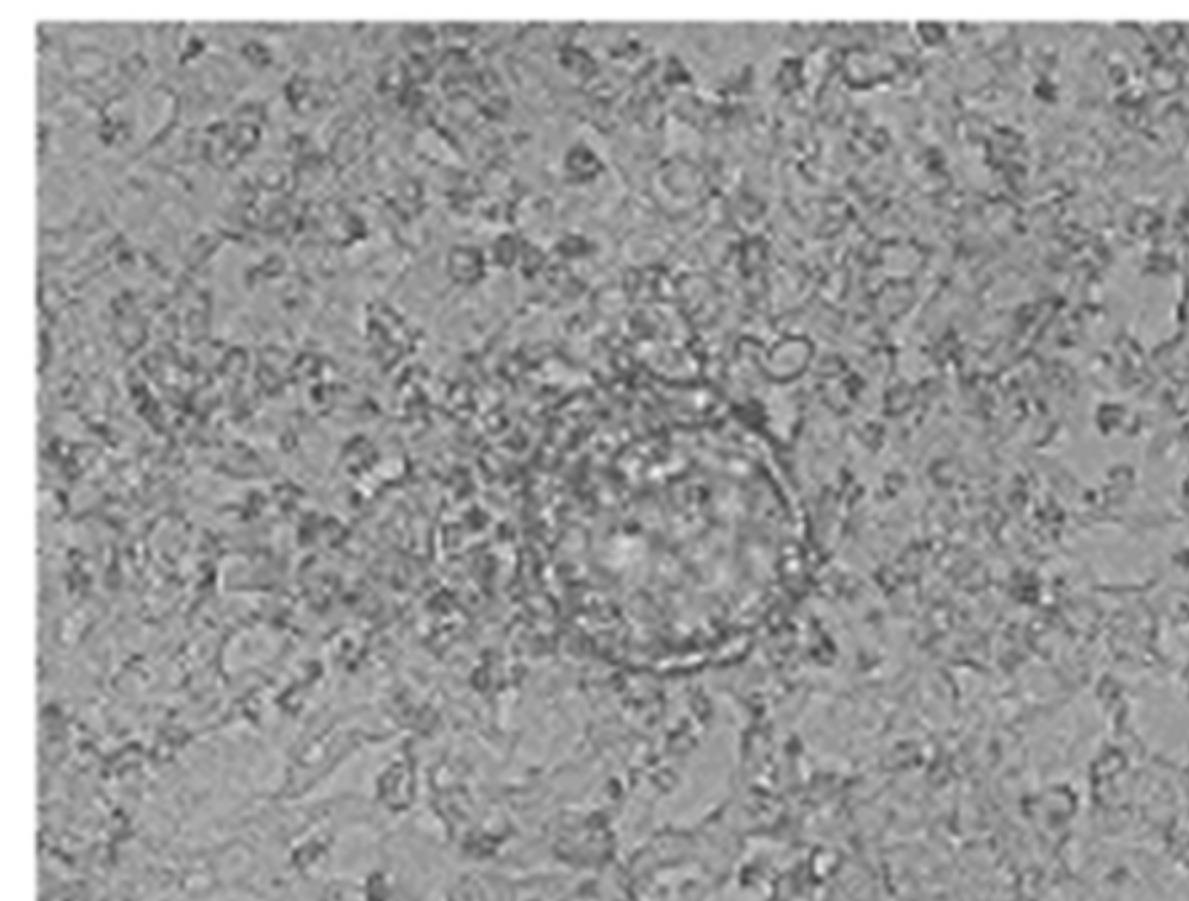

5

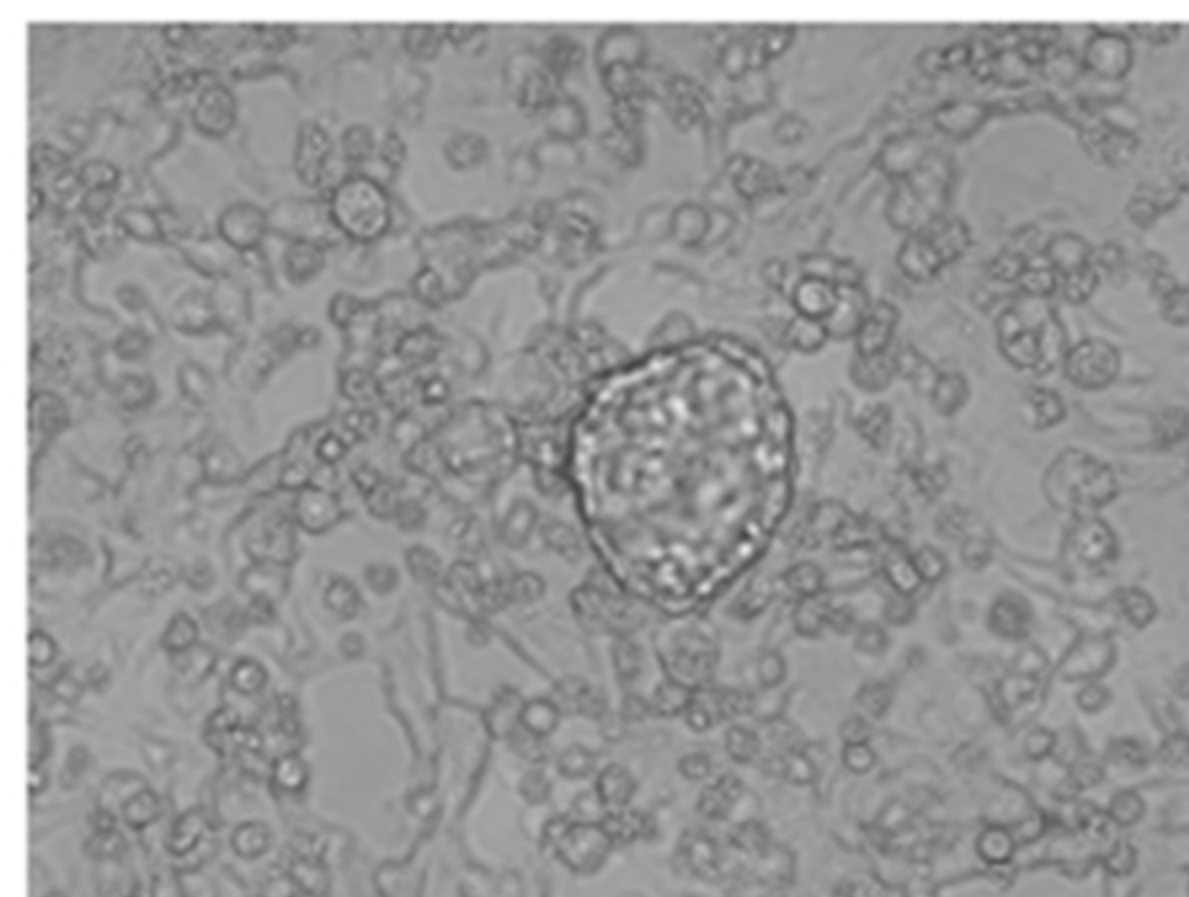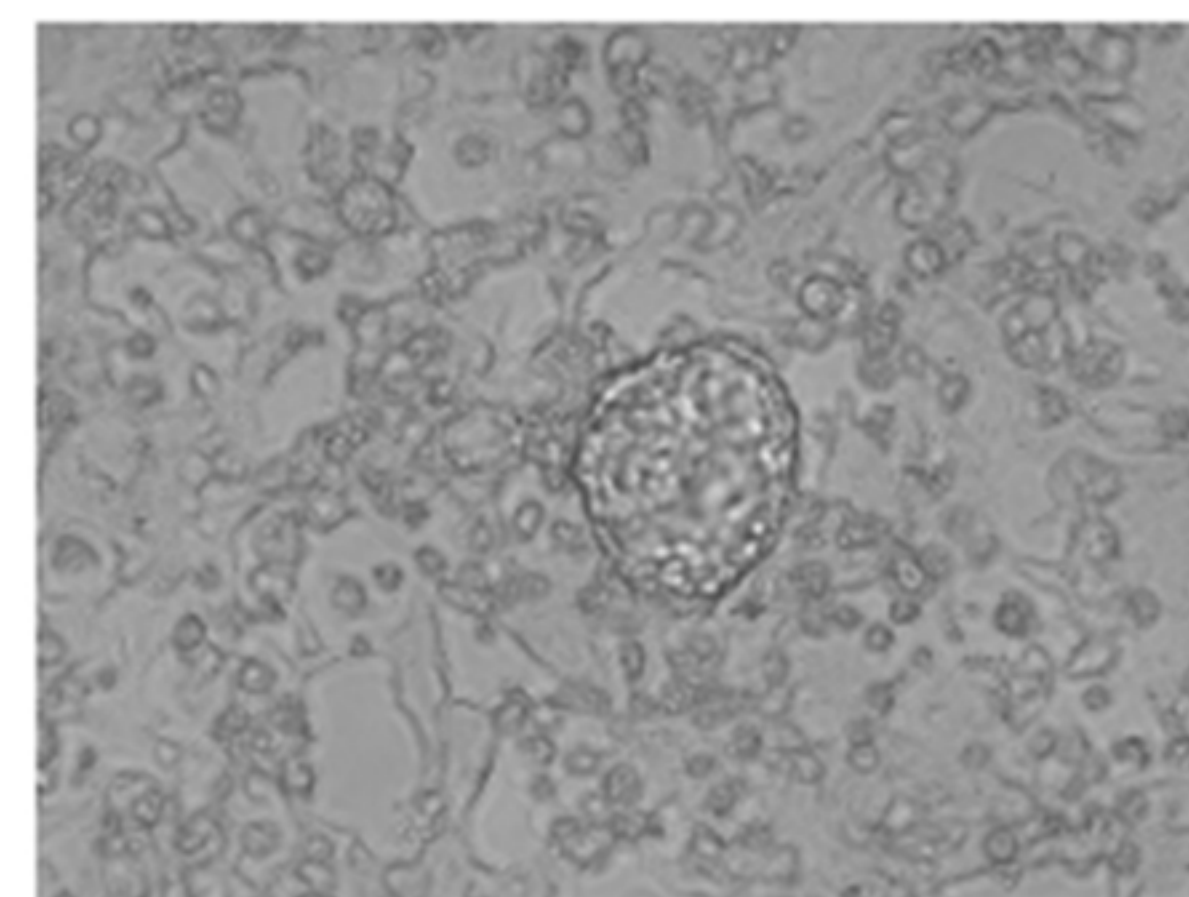

Supplement: cddiscovery201757-s2.pdf [file cddiscovery201757-s2.pdf]
